# Supplementary material for: Proteomic Profiling of Chemotherapy Responses in FOLFOX-Resistant Colorectal Cancer Cells
Source: MDPI journal article supplement (doi:10.3390/ijms24129899), 2023-06-08
Supplement: s1 [file s1]

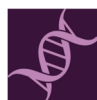

Article

# Proteomic Profiling of Chemotherapy Responses in FOLFOX-Resistant Colorectal Cancer Cells

Shing Yau Tam <sup>1,\*</sup>, Md Zahirul Islam Khan <sup>1</sup>, Ju-Yu Chen <sup>1</sup>, Jerica Hiu Yui Yip <sup>1</sup>, Hong Yiu Yan <sup>1</sup>, Tsz Yan Tam <sup>1</sup>, Helen Ka Wai Law <sup>1</sup>

Table S1. List of DEPs in DLD1-R and DLD1 comparison

| Protein (Gene symbol) | Up-regulated or Down-regulated | Log2 FC  | p value  | q value  |
|-----------------------|--------------------------------|----------|----------|----------|
| NDUFAF1               | Up-regulated                   | 13.28771 | 0.000193 | 0.010875 |
| GTPBP1                | Up-regulated                   | 13.28771 | 2.21E-06 | 0.000518 |
| PSMG3                 | Up-regulated                   | 13.28771 | 9.92E-08 | 0.000139 |
| BRIX1                 | Up-regulated                   | 13.28771 | 0.00041  | 0.01611  |
| SNX27                 | Up-regulated                   | 13.28771 | 1.77E-06 | 0.000505 |
| BTAF1                 | Up-regulated                   | 13.28771 | 1.08E-05 | 0.001682 |
| UFC1                  | Up-regulated                   | 13.28771 | 2.45E-07 | 0.000172 |
| HINT3                 | Up-regulated                   | 8.124222 | 0.027485 | 0.073622 |
| PPP6R1                | Up-regulated                   | 6.376713 | 0.045393 | 0.093669 |
| LEMD3                 | Up-regulated                   | 5.84017  | 0.039771 | 0.086704 |
| NOC3L                 | Up-regulated                   | 5.489149 | 0.000659 | 0.021423 |
| BRCC3                 | Up-regulated                   | 5.260601 | 0.049814 | 0.09817  |
| VPS53                 | Up-regulated                   | 5.157159 | 0.005494 | 0.038633 |
| KRT80                 | Up-regulated                   | 4.896853 | 0.034429 | 0.081925 |
| CNBP                  | Up-regulated                   | 4.66366  | 0.002963 | 0.031266 |
| LYRM7                 | Up-regulated                   | 4.63208  | 0.005412 | 0.038633 |
| MRPL19                | Up-regulated                   | 4.111114 | 0.00101  | 0.02548  |
| BLMH                  | Up-regulated                   | 4.025262 | 0.004822 | 0.037468 |
| HMOX1                 | Up-regulated                   | 3.636482 | 0.029916 | 0.076076 |
| ARL6IP1               | Up-regulated                   | 3.550774 | 0.037998 | 0.085498 |
| UBA5                  | Up-regulated                   | 3.276298 | 0.002902 | 0.031152 |
| OSBPL1A               | Up-regulated                   | 3.235296 | 0.001328 | 0.025747 |
| SULT1A3               | Up-regulated                   | 3.208789 | 0.011568 | 0.050237 |
| MRPS36                | Up-regulated                   | 3.207862 | 0.040524 | 0.087733 |
| ACSL1                 | Up-regulated                   | 3.186404 | 0.018233 | 0.059764 |
| RAB5IF                | Up-regulated                   | 3.11439  | 0.009    | 0.0458   |
| KPNA5                 | Up-regulated                   | 2.953091 | 0.043919 | 0.091536 |
| UNC119B               | Up-regulated                   | 2.869334 | 0.006406 | 0.04132  |
| UBR5                  | Up-regulated                   | 2.791099 | 0.007921 | 0.043686 |
| EBNA1BP2              | Up-regulated                   | 2.661583 | 0.041532 | 0.088633 |
| GMPR2                 | Up-regulated                   | 2.631457 | 0.003518 | 0.032285 |
| NUP98                 | Up-regulated                   | 2.613562 | 0.010979 | 0.049249 |
| PARM1                 | Up-regulated                   | 2.442218 | 0.009159 | 0.0458   |
| OXSRI                 | Up-regulated                   | 2.43619  | 0.0228   | 0.066593 |
| STUB1                 | Up-regulated                   | 2.426633 | 0.017698 | 0.058787 |

|          |              |          |          |          |
|----------|--------------|----------|----------|----------|
| PSAP     | Up-regulated | 2.388984 | 0.047765 | 0.09634  |
| MLST8    | Up-regulated | 2.378344 | 0.022966 | 0.066593 |
| MRFAP1   | Up-regulated | 2.334208 | 0.040933 | 0.087885 |
| ITPA     | Up-regulated | 2.275218 | 0.001209 | 0.02548  |
| MOV10    | Up-regulated | 2.225805 | 0.031307 | 0.077989 |
| DKC1     | Up-regulated | 2.213916 | 0.022273 | 0.06585  |
| TMX2     | Up-regulated | 2.137586 | 0.002076 | 0.028627 |
| SPAG9    | Up-regulated | 2.135847 | 0.003122 | 0.031308 |
| ALDH5A1  | Up-regulated | 2.126964 | 0.004811 | 0.037468 |
| OGFOD1   | Up-regulated | 2.112502 | 0.000175 | 0.010875 |
| PSMF1    | Up-regulated | 2.055049 | 0.02104  | 0.06406  |
| MAVS     | Up-regulated | 2.028624 | 0.004311 | 0.034571 |
| HSPB3    | Up-regulated | 2.003496 | 0.000874 | 0.024113 |
| COMTD1   | Up-regulated | 1.968128 | 0.011716 | 0.050237 |
| CPNE1    | Up-regulated | 1.967748 | 0.00431  | 0.034571 |
| DPP7     | Up-regulated | 1.961765 | 0.005027 | 0.038418 |
| TOM1L1   | Up-regulated | 1.952198 | 0.019363 | 0.061466 |
| KRT20    | Up-regulated | 1.950988 | 0.006406 | 0.04132  |
| DMAC1    | Up-regulated | 1.922818 | 0.00268  | 0.029914 |
| ADGRG1   | Up-regulated | 1.913735 | 0.039592 | 0.086592 |
| RRS1     | Up-regulated | 1.887555 | 0.006961 | 0.042006 |
| SQSTM1   | Up-regulated | 1.864131 | 0.000354 | 0.015065 |
| CSNK1A1  | Up-regulated | 1.784997 | 0.014225 | 0.053347 |
| LRBA     | Up-regulated | 1.780563 | 0.002133 | 0.028816 |
| MRPL15   | Up-regulated | 1.76193  | 0.001529 | 0.025747 |
| STK26    | Up-regulated | 1.750187 | 0.022911 | 0.066593 |
| C8orf82  | Up-regulated | 1.72459  | 0.028484 | 0.074846 |
| BCAR1    | Up-regulated | 1.712498 | 0.001434 | 0.025747 |
| TAX1BP1  | Up-regulated | 1.692341 | 0.04546  | 0.093669 |
| MRPL52   | Up-regulated | 1.673384 | 0.025405 | 0.070343 |
| SEC23B   | Up-regulated | 1.668719 | 0.006725 | 0.042006 |
| SH3BGRL  | Up-regulated | 1.653075 | 0.040328 | 0.08752  |
| DDX27    | Up-regulated | 1.652407 | 0.000686 | 0.021423 |
| GNA11    | Up-regulated | 1.648165 | 0.001529 | 0.025747 |
| PLXNB2   | Up-regulated | 1.642496 | 0.009127 | 0.0458   |
| BAZ1B    | Up-regulated | 1.632471 | 0.005374 | 0.038633 |
| SF3B5    | Up-regulated | 1.621415 | 0.006729 | 0.042006 |
| ARFGAP1  | Up-regulated | 1.605696 | 0.011676 | 0.050237 |
| EDF1     | Up-regulated | 1.6024   | 0.020124 | 0.062335 |
| WDR55    | Up-regulated | 1.58698  | 0.040616 | 0.087733 |
| ECI1     | Up-regulated | 1.572797 | 0.015272 | 0.054547 |
| RPL30    | Up-regulated | 1.572349 | 5.24E-05 | 0.005669 |
| DYNC1LI2 | Up-regulated | 1.56813  | 0.01977  | 0.061921 |
| YTHDF3   | Up-regulated | 1.561097 | 1.01E-05 | 0.001682 |
| MRPL47   | Up-regulated | 1.56076  | 0.000184 | 0.010875 |
| ZC3H14   | Up-regulated | 1.554807 | 0.038718 | 0.086184 |
| PPL      | Up-regulated | 1.551118 | 0.014876 | 0.054337 |
| ITPR3    | Up-regulated | 1.5308   | 0.002563 | 0.029308 |

|            |              |          |          |          |
|------------|--------------|----------|----------|----------|
| UBXN4      | Up-regulated | 1.530761 | 0.002948 | 0.031266 |
| SLC38A10   | Up-regulated | 1.526209 | 0.03066  | 0.07727  |
| CFAP298    | Up-regulated | 1.514938 | 0.006487 | 0.04132  |
| UACA       | Up-regulated | 1.487945 | 0.046897 | 0.095444 |
| FAM120A    | Up-regulated | 1.483391 | 0.009347 | 0.04596  |
| MPI        | Up-regulated | 1.48335  | 0.041123 | 0.088157 |
| DNMT1      | Up-regulated | 1.474454 | 4.58E-05 | 0.005369 |
| DCAF1      | Up-regulated | 1.459656 | 0.012668 | 0.051341 |
| GADD45GIP1 | Up-regulated | 1.449983 | 0.028925 | 0.075018 |
| DIS3L2     | Up-regulated | 1.446853 | 0.035738 | 0.083022 |
| MRPL44     | Up-regulated | 1.411095 | 0.00412  | 0.034282 |
| H2AC17     | Up-regulated | 1.370916 | 0.047817 | 0.09634  |
| H2AC8      | Up-regulated | 1.370916 | 0.047817 | 0.09634  |
| EPS8L2     | Up-regulated | 1.368322 | 0.001915 | 0.027275 |
| DHRS7      | Up-regulated | 1.36749  | 0.010916 | 0.049249 |
| PWWP3A     | Up-regulated | 1.358746 | 0.003654 | 0.032338 |
| DOK1       | Up-regulated | 1.355675 | 0.02011  | 0.062335 |
| CUL2       | Up-regulated | 1.351338 | 0.002407 | 0.028871 |
| MGST1      | Up-regulated | 1.344361 | 0.034953 | 0.082222 |
| ASPSCR1    | Up-regulated | 1.330615 | 0.001969 | 0.027697 |
| EVPL       | Up-regulated | 1.324235 | 0.002308 | 0.028816 |
| LANCL2     | Up-regulated | 1.318905 | 0.014027 | 0.052986 |
| YBX1       | Up-regulated | 1.304236 | 0.010218 | 0.048148 |
| DDB1       | Up-regulated | 1.299446 | 0.001505 | 0.025747 |
| NEDD8      | Up-regulated | 1.28025  | 0.001157 | 0.02548  |
| GCC2       | Up-regulated | 1.270937 | 0.015266 | 0.054547 |
| RPS17      | Up-regulated | 1.269232 | 0.000703 | 0.021453 |
| GRSF1      | Up-regulated | 1.267074 | 0.001392 | 0.025747 |
| CKAP5      | Up-regulated | 1.266739 | 0.007028 | 0.042006 |
| RNF40      | Up-regulated | 1.266436 | 0.004098 | 0.034282 |
| MRPL48     | Up-regulated | 1.265392 | 0.003467 | 0.032285 |
| PNO1       | Up-regulated | 1.25633  | 0.033591 | 0.08075  |
| TSR1       | Up-regulated | 1.253829 | 0.020174 | 0.062353 |
| MRPL49     | Up-regulated | 1.252097 | 0.016049 | 0.055866 |
| DYNC1I2    | Up-regulated | 1.228328 | 0.005884 | 0.039975 |
| TOLLIP     | Up-regulated | 1.218308 | 0.02068  | 0.0635   |
| XRCC1      | Up-regulated | 1.217497 | 0.046034 | 0.09398  |
| IGF2BP3    | Up-regulated | 1.215942 | 0.01324  | 0.05182  |
| GIPC1      | Up-regulated | 1.212122 | 0.026498 | 0.07182  |
| MRPL9      | Up-regulated | 1.210731 | 0.044709 | 0.092872 |
| FASTKD2    | Up-regulated | 1.203495 | 0.030506 | 0.077021 |
| RPS23      | Up-regulated | 1.196371 | 0.048175 | 0.096645 |
| MRPL54     | Up-regulated | 1.193378 | 0.007241 | 0.042429 |
| IGF2R      | Up-regulated | 1.184064 | 0.001569 | 0.025747 |
| IK         | Up-regulated | 1.174894 | 0.010469 | 0.048816 |
| H1-4       | Up-regulated | 1.141335 | 0.022311 | 0.06585  |
| RPS16      | Up-regulated | 1.139024 | 0.001127 | 0.02548  |
| MRPS31     | Up-regulated | 1.118756 | 0.045492 | 0.093669 |

|          |                |          |          |          |
|----------|----------------|----------|----------|----------|
| TIMM17B  | Up-regulated   | 1.118467 | 0.006599 | 0.041803 |
| MRPL12   | Up-regulated   | 1.112012 | 0.000981 | 0.02548  |
| NDUFAB3  | Up-regulated   | 1.111368 | 0.009145 | 0.0458   |
| CTSD     | Up-regulated   | 1.106826 | 0.003001 | 0.031266 |
| UBE2V1   | Up-regulated   | 1.098154 | 0.006882 | 0.042006 |
| GLIPR2   | Up-regulated   | 1.086264 | 0.037507 | 0.085074 |
| TRERF1   | Up-regulated   | 1.082017 | 0.039285 | 0.086458 |
| FBXO21   | Up-regulated   | 1.079296 | 0.049253 | 0.097832 |
| FAM91A1  | Up-regulated   | 1.062798 | 0.015634 | 0.055037 |
| SNX5     | Up-regulated   | 1.061431 | 0.03316  | 0.080561 |
| RRBP1    | Up-regulated   | 1.060565 | 0.003081 | 0.031308 |
| RPS25    | Up-regulated   | 1.058254 | 0.012636 | 0.051341 |
| SCO2     | Up-regulated   | 1.042733 | 0.010612 | 0.049212 |
| ELAC2    | Up-regulated   | 1.041691 | 0.008179 | 0.044411 |
| RWDD1    | Up-regulated   | 1.040827 | 0.022096 | 0.065694 |
| UAP1     | Up-regulated   | 1.037616 | 0.014308 | 0.053374 |
| TALDO1   | Up-regulated   | 1.023369 | 0.001115 | 0.02548  |
| PAK1     | Up-regulated   | 1.022001 | 0.035058 | 0.082307 |
| RPL14    | Up-regulated   | 1.018311 | 0.016266 | 0.056067 |
| RPS11    | Up-regulated   | 1.016802 | 0.000211 | 0.011395 |
| RPL8     | Up-regulated   | 1.015712 | 0.002672 | 0.029914 |
| SCLY     | Up-regulated   | 1.002226 | 0.044779 | 0.092881 |
| GSR      | Down-regulated | -1.00473 | 0.040654 | 0.087733 |
| UFD1     | Down-regulated | -1.00502 | 0.01027  | 0.048148 |
| ADK      | Down-regulated | -1.009   | 0.001515 | 0.025747 |
| HSP90AB1 | Down-regulated | -1.01378 | 0.000342 | 0.015018 |
| PREB     | Down-regulated | -1.01819 | 0.013573 | 0.05222  |
| TRMT10C  | Down-regulated | -1.0206  | 0.021453 | 0.064562 |
| GNPNAT1  | Down-regulated | -1.02559 | 0.00229  | 0.028816 |
| SSB      | Down-regulated | -1.03028 | 0.029739 | 0.076076 |
| RBM14    | Down-regulated | -1.03928 | 0.029073 | 0.075018 |
| HLA-B    | Down-regulated | -1.04007 | 0.026556 | 0.07182  |
| PTPN1    | Down-regulated | -1.0448  | 0.005483 | 0.038633 |
| NCEH1    | Down-regulated | -1.04585 | 0.012293 | 0.050887 |
| VCL      | Down-regulated | -1.04621 | 6.24E-05 | 0.005853 |
| COPG1    | Down-regulated | -1.04695 | 0.017271 | 0.057829 |
| POLR1C   | Down-regulated | -1.04814 | 0.032927 | 0.080252 |
| ZC3H18   | Down-regulated | -1.04864 | 0.018745 | 0.060463 |
| RRM1     | Down-regulated | -1.06444 | 0.002802 | 0.030782 |
| TPM3     | Down-regulated | -1.07115 | 0.006818 | 0.042006 |
| COPA     | Down-regulated | -1.07324 | 0.000122 | 0.00961  |
| PFDN2    | Down-regulated | -1.07429 | 0.023057 | 0.066719 |
| ZNF207   | Down-regulated | -1.08663 | 0.005881 | 0.039975 |
| CA2      | Down-regulated | -1.09138 | 0.000125 | 0.00961  |
| COTL1    | Down-regulated | -1.09264 | 0.02131  | 0.06431  |
| NUDCD1   | Down-regulated | -1.10772 | 0.034955 | 0.082222 |
| PVR      | Down-regulated | -1.11021 | 0.032528 | 0.079973 |
| CD44     | Down-regulated | -1.11864 | 0.046997 | 0.095508 |

|          |                |          |          |          |
|----------|----------------|----------|----------|----------|
| MAP2K2   | Down-regulated | -1.12575 | 0.016168 | 0.056003 |
| SFXN1    | Down-regulated | -1.13649 | 0.024601 | 0.069331 |
| IPO9     | Down-regulated | -1.13657 | 0.024028 | 0.068263 |
| XPO5     | Down-regulated | -1.13915 | 0.029543 | 0.075954 |
| DIAPH1   | Down-regulated | -1.14247 | 0.010656 | 0.049212 |
| MTA2     | Down-regulated | -1.15572 | 0.003061 | 0.031308 |
| SSBP1    | Down-regulated | -1.1599  | 0.039137 | 0.086266 |
| EMC8     | Down-regulated | -1.16088 | 0.049163 | 0.09779  |
| CFL2     | Down-regulated | -1.16342 | 0.007552 | 0.043196 |
| NUDT19   | Down-regulated | -1.17045 | 0.028785 | 0.074964 |
| NDUFS6   | Down-regulated | -1.21056 | 0.003412 | 0.032285 |
| ALG5     | Down-regulated | -1.21056 | 0.008289 | 0.044516 |
| UBA6     | Down-regulated | -1.21122 | 0.013592 | 0.05222  |
| MT-CO1   | Down-regulated | -1.21646 | 0.006853 | 0.042006 |
| PPP2R1B  | Down-regulated | -1.22537 | 0.041669 | 0.088735 |
| PLOD1    | Down-regulated | -1.22671 | 0.012852 | 0.051415 |
| AASDHPPT | Down-regulated | -1.23227 | 0.011882 | 0.050325 |
| VPS26B   | Down-regulated | -1.23856 | 0.005373 | 0.038633 |
| CXCL5    | Down-regulated | -1.25777 | 0.007728 | 0.043298 |
| HAT1     | Down-regulated | -1.26226 | 0.032237 | 0.079536 |
| CAMSAP3  | Down-regulated | -1.26303 | 0.023542 | 0.067429 |
| CDV3     | Down-regulated | -1.26378 | 0.008095 | 0.044347 |
| ZNF221   | Down-regulated | -1.26573 | 0.015502 | 0.055037 |
| NLRP2    | Down-regulated | -1.26727 | 0.02763  | 0.073732 |
| AK4      | Down-regulated | -1.26929 | 0.001664 | 0.026598 |
| HMGB2    | Down-regulated | -1.27027 | 0.008711 | 0.045126 |
| VDAC3    | Down-regulated | -1.28179 | 0.007776 | 0.043392 |
| HMOX2    | Down-regulated | -1.28205 | 0.000412 | 0.01611  |
| PPAT     | Down-regulated | -1.28431 | 0.002827 | 0.03082  |
| CHAC2    | Down-regulated | -1.29388 | 0.000364 | 0.015071 |
| KHSRP    | Down-regulated | -1.29629 | 0.015654 | 0.055037 |
| KRT13    | Down-regulated | -1.30795 | 0.005486 | 0.038633 |
| PPP4C    | Down-regulated | -1.30803 | 0.036549 | 0.083663 |
| TPM1     | Down-regulated | -1.31387 | 0.019835 | 0.061985 |
| DDAH1    | Down-regulated | -1.32861 | 0.039125 | 0.086266 |
| PNP      | Down-regulated | -1.3298  | 0.00029  | 0.013599 |
| CSK      | Down-regulated | -1.34083 | 0.006493 | 0.04132  |
| CIAPIN1  | Down-regulated | -1.34382 | 0.013172 | 0.05182  |
| PPP1CA   | Down-regulated | -1.34452 | 0.001741 | 0.026908 |
| SETDB1   | Down-regulated | -1.34639 | 0.005732 | 0.039628 |
| PHGDH    | Down-regulated | -1.35245 | 0.031685 | 0.078674 |
| NDUFB9   | Down-regulated | -1.37445 | 0.014928 | 0.054387 |
| ACLY     | Down-regulated | -1.37874 | 5.67E-05 | 0.005693 |
| GCN1     | Down-regulated | -1.37935 | 0.014775 | 0.054251 |
| MCM5     | Down-regulated | -1.39063 | 0.049611 | 0.098126 |
| TXNDC5   | Down-regulated | -1.39804 | 0.035509 | 0.082952 |
| VCP      | Down-regulated | -1.4006  | 0.022573 | 0.066272 |
| P4HA1    | Down-regulated | -1.40932 | 0.012553 | 0.051341 |

|           |                |          |          |          |
|-----------|----------------|----------|----------|----------|
| DNAJB1    | Down-regulated | -1.41079 | 0.013339 | 0.05182  |
| DDX3X     | Down-regulated | -1.46054 | 0.01161  | 0.050237 |
| CRIP2     | Down-regulated | -1.4814  | 0.000542 | 0.019531 |
| TTC9C     | Down-regulated | -1.48393 | 0.045276 | 0.093635 |
| IGF2BP2   | Down-regulated | -1.49627 | 0.016471 | 0.056496 |
| PPP1CB    | Down-regulated | -1.49758 | 0.001027 | 0.02548  |
| HEBP1     | Down-regulated | -1.52216 | 0.024902 | 0.069623 |
| ZRANB2    | Down-regulated | -1.54801 | 0.00225  | 0.028816 |
| ACBD3     | Down-regulated | -1.55192 | 0.00367  | 0.032338 |
| NUP54     | Down-regulated | -1.57685 | 0.00189  | 0.027275 |
| CDCP1     | Down-regulated | -1.58118 | 0.004214 | 0.034571 |
| EEF1A2    | Down-regulated | -1.58782 | 0.000132 | 0.00961  |
| PARP1     | Down-regulated | -1.61294 | 0.000684 | 0.021423 |
| GPRC5A    | Down-regulated | -1.61376 | 0.023969 | 0.068233 |
| SARS1     | Down-regulated | -1.64637 | 0.000427 | 0.016234 |
| PPFIBP1   | Down-regulated | -1.68769 | 0.015048 | 0.054517 |
| TXNL1     | Down-regulated | -1.6898  | 0.002315 | 0.028816 |
| SCD       | Down-regulated | -1.72556 | 0.039554 | 0.086592 |
| P4HA2     | Down-regulated | -1.74014 | 0.036238 | 0.083407 |
| USP14     | Down-regulated | -1.75496 | 0.00635  | 0.04132  |
| SNAPIN    | Down-regulated | -1.76094 | 0.005254 | 0.038633 |
| GEMIN5    | Down-regulated | -1.76169 | 0.00125  | 0.02548  |
| ARHGEF1   | Down-regulated | -1.77689 | 0.010767 | 0.049249 |
| BAG3      | Down-regulated | -1.77764 | 0.000225 | 0.011712 |
| ICAM1     | Down-regulated | -1.77848 | 0.043727 | 0.091509 |
| EXOSC4    | Down-regulated | -1.78567 | 0.019894 | 0.062032 |
| SV2C      | Down-regulated | -1.788   | 0.029908 | 0.076076 |
| FSIP2     | Down-regulated | -1.79383 | 0.003527 | 0.032285 |
| PAPSS2    | Down-regulated | -1.79676 | 0.010945 | 0.049249 |
| FLYWCH2   | Down-regulated | -1.80937 | 0.00939  | 0.046009 |
| TCEA1     | Down-regulated | -1.81742 | 0.011337 | 0.04998  |
| PPP1R2    | Down-regulated | -1.8266  | 0.005454 | 0.038633 |
| TUBA4A    | Down-regulated | -1.8401  | 0.000833 | 0.023768 |
| MAPT      | Down-regulated | -1.84122 | 0.030046 | 0.07617  |
| KIF23     | Down-regulated | -1.84491 | 0.00749  | 0.043196 |
| BRI3BP    | Down-regulated | -1.85383 | 0.006044 | 0.040668 |
| CCDC51    | Down-regulated | -1.86404 | 0.012303 | 0.050887 |
| RBM10     | Down-regulated | -1.88103 | 0.015158 | 0.054517 |
| COPS5     | Down-regulated | -1.97703 | 0.014569 | 0.053899 |
| RFC2      | Down-regulated | -1.97958 | 0.036389 | 0.083617 |
| RAB11FIP1 | Down-regulated | -1.99416 | 0.009819 | 0.046966 |
| RNASEH2B  | Down-regulated | -2.02213 | 0.002163 | 0.028816 |
| RUNDC3B   | Down-regulated | -2.05574 | 0.032668 | 0.079973 |
| WDR12     | Down-regulated | -2.05943 | 0.016981 | 0.057765 |
| CPSF7     | Down-regulated | -2.06083 | 0.028877 | 0.075018 |
| CNN3      | Down-regulated | -2.07011 | 0.009553 | 0.046328 |
| METTL26   | Down-regulated | -2.13054 | 0.010248 | 0.048148 |
| FAM241A   | Down-regulated | -2.14875 | 0.002315 | 0.028816 |

|          |                |          |          |          |
|----------|----------------|----------|----------|----------|
| RALA     | Down-regulated | -2.15367 | 0.011069 | 0.049416 |
| MTX2     | Down-regulated | -2.17174 | 0.016586 | 0.056752 |
| GNG12    | Down-regulated | -2.18123 | 0.018935 | 0.060794 |
| LUC7L    | Down-regulated | -2.18515 | 0.006963 | 0.042006 |
| IL18     | Down-regulated | -2.23594 | 0.003865 | 0.033344 |
| ASMTL    | Down-regulated | -2.25416 | 0.039489 | 0.086592 |
| KIF11    | Down-regulated | -2.27129 | 0.009093 | 0.0458   |
| HMGA1    | Down-regulated | -2.31195 | 0.019135 | 0.061288 |
| GNAQ     | Down-regulated | -2.39066 | 0.022347 | 0.06585  |
| EIF4EBP2 | Down-regulated | -2.41947 | 0.030715 | 0.07727  |
| SMNDC1   | Down-regulated | -2.44838 | 0.010673 | 0.049212 |
| RECQL    | Down-regulated | -2.45061 | 0.000137 | 0.00961  |
| RRM2     | Down-regulated | -2.5097  | 0.002176 | 0.028816 |
| GNAS     | Down-regulated | -2.51788 | 0.002464 | 0.028871 |
| CCDC124  | Down-regulated | -2.5724  | 0.001785 | 0.027275 |
| PFDN4    | Down-regulated | -2.58141 | 0.00876  | 0.045126 |
| GOLGA5   | Down-regulated | -2.6136  | 0.014596 | 0.053899 |
| LCN2     | Down-regulated | -2.62505 | 0.004599 | 0.036333 |
| ZNF598   | Down-regulated | -2.87025 | 0.003098 | 0.031308 |
| HPRT1    | Down-regulated | -2.87626 | 0.000682 | 0.021423 |
| PBK      | Down-regulated | -2.95987 | 0.013399 | 0.051907 |
| EHD2     | Down-regulated | -2.97117 | 0.008178 | 0.044411 |
| NDUFB3   | Down-regulated | -3.00475 | 0.034694 | 0.082137 |
| FBH1     | Down-regulated | -3.07515 | 0.00389  | 0.033353 |
| EXOC7    | Down-regulated | -3.1304  | 0.003326 | 0.032285 |
| ZPR1     | Down-regulated | -3.25085 | 0.001112 | 0.02548  |
| EML4     | Down-regulated | -3.29131 | 0.001683 | 0.026598 |
| CADM1    | Down-regulated | -3.49778 | 0.003818 | 0.033141 |
| MYO1E    | Down-regulated | -3.63692 | 0.014603 | 0.053899 |
| MRPL39   | Down-regulated | -3.71186 | 0.010885 | 0.049249 |
| AP2A2    | Down-regulated | -6.39318 | 0.038514 | 0.086184 |
| NDUFA6   | Down-regulated | -6.76389 | 0.033722 | 0.080926 |
| MAPRE2   | Down-regulated | -13.2877 | 4.79E-07 | 0.000225 |
| SPARC    | Down-regulated | -13.2877 | 5.17E-06 | 0.001039 |

**Table S2.** List of DEPs in HCT116-R and HCT116 comparison

| Protein (Gene symbol) | Up-regulated or Down-regulated | Log2 FC  | p value   | q value  |
|-----------------------|--------------------------------|----------|-----------|----------|
| SPARC                 | Up-regulated                   | 13.28771 | 0.0008088 | 0.086075 |
| HSPB3                 | Up-regulated                   | 4.232121 | 0.0128787 | 0.213207 |
| KRT7                  | Up-regulated                   | 3.956493 | 0.0037939 | 0.144266 |
| MAL2                  | Up-regulated                   | 3.588477 | 0.0054075 | 0.154885 |
| SLC1A3                | Up-regulated                   | 3.529859 | 0.0384931 | 0.277843 |
| APOBEC3G              | Up-regulated                   | 3.390062 | 2.89E-05  | 0.039531 |
| NCAM1                 | Up-regulated                   | 3.320068 | 0.0045049 | 0.147131 |
| DCUN1D3               | Up-regulated                   | 2.503125 | 0.000116  | 0.039531 |
| PCDH1                 | Up-regulated                   | 2.274732 | 0.0211774 | 0.241679 |
| PPIL1                 | Up-regulated                   | 2.137416 | 0.0154127 | 0.223155 |
| IL18                  | Up-regulated                   | 2.100085 | 0.0002295 | 0.046007 |
| DHRS1                 | Up-regulated                   | 2.080868 | 0.0168185 | 0.223155 |
| APOBEC3F              | Up-regulated                   | 2.027802 | 0.0344024 | 0.265474 |
| RPEL1                 | Up-regulated                   | 2.008542 | 0.0291546 | 0.25293  |
| S100A4                | Up-regulated                   | 1.926389 | 0.0001314 | 0.039531 |
| ALDH2                 | Up-regulated                   | 1.912596 | 0.0250027 | 0.246468 |
| PPFIBP1               | Up-regulated                   | 1.837671 | 0.0011696 | 0.095931 |
| LGALS3BP              | Up-regulated                   | 1.827325 | 7.91E-05  | 0.039531 |
| EFHD2                 | Up-regulated                   | 1.798583 | 0.003454  | 0.144266 |
| GMPPB                 | Up-regulated                   | 1.753767 | 0.0388842 | 0.278214 |
| SH3KBP1               | Up-regulated                   | 1.733082 | 0.0134312 | 0.216694 |
| RDH14                 | Up-regulated                   | 1.71833  | 0.0278807 | 0.249063 |
| HAGH                  | Up-regulated                   | 1.605864 | 0.0073498 | 0.178747 |
| D99                   | Up-regulated                   | 1.583272 | 0.0091407 | 0.190682 |
| IFITM1                | Up-regulated                   | 1.578889 | 0.0119274 | 0.208381 |
| ACSF2                 | Up-regulated                   | 1.505225 | 0.0053325 | 0.154885 |
| EPB41L1               | Up-regulated                   | 1.466588 | 0.00167   | 0.115902 |
| DUSP3                 | Up-regulated                   | 1.445444 | 0.0455231 | 0.28608  |
| ASMTL                 | Up-regulated                   | 1.444255 | 0.0146215 | 0.223155 |
| TMED5                 | Up-regulated                   | 1.434339 | 0.041331  | 0.281238 |
| FLNB                  | Up-regulated                   | 1.339116 | 0.000869  | 0.086075 |
| HMG5                  | Up-regulated                   | 1.306786 | 0.0087141 | 0.190682 |
| PTPN11                | Up-regulated                   | 1.271055 | 0.0028237 | 0.137711 |
| PODXL                 | Up-regulated                   | 1.231556 | 0.0228406 | 0.245332 |
| EPHA2                 | Up-regulated                   | 1.213149 | 0.0137485 | 0.217552 |
| MACF1                 | Up-regulated                   | 1.190548 | 0.0370292 | 0.274317 |
| HTATIP2               | Up-regulated                   | 1.179904 | 0.0049341 | 0.151134 |
| AK4                   | Up-regulated                   | 1.172502 | 0.0021836 | 0.121026 |
| ATP6V1G1              | Up-regulated                   | 1.162766 | 0.0166058 | 0.223155 |
| HGS                   | Up-regulated                   | 1.122885 | 0.0329003 | 0.262693 |
| PACSIN2               | Up-regulated                   | 1.114835 | 0.0213292 | 0.241679 |
| MLEC                  | Up-regulated                   | 1.0869   | 0.007494  | 0.178747 |
| PPP1R18               | Up-regulated                   | 1.085596 | 0.0230449 | 0.246062 |



|           |                |          |           |          |
|-----------|----------------|----------|-----------|----------|
| MYOF      | Up-regulated   | 1.083189 | 0.0001283 | 0.039531 |
| ALDH5A1   | Up-regulated   | 1.081955 | 0.0452481 | 0.28608  |
| S100A11   | Up-regulated   | 1.075463 | 0.0131942 | 0.216445 |
| FAM169A   | Up-regulated   | 1.059988 | 0.0414572 | 0.281238 |
| ADAM10    | Up-regulated   | 1.024902 | 0.0117521 | 0.208381 |
| CD2AP     | Up-regulated   | 1.012843 | 0.0153793 | 0.223155 |
| FAM120A   | Down-regulated | -1.01068 | 0.0487773 | 0.290898 |
| COPS7A    | Down-regulated | -1.02697 | 0.0164134 | 0.223155 |
| MAOA      | Down-regulated | -1.02961 | 0.0479846 | 0.290898 |
| CDC37L1   | Down-regulated | -1.04342 | 0.0226985 | 0.245332 |
| RNF20     | Down-regulated | -1.04798 | 0.0466887 | 0.289191 |
| SRSF7     | Down-regulated | -1.05522 | 0.0213796 | 0.241679 |
| NNT       | Down-regulated | -1.05553 | 0.0161629 | 0.223155 |
| TBK1      | Down-regulated | -1.09051 | 0.013985  | 0.217552 |
| PYCR2     | Down-regulated | -1.13918 | 0.018829  | 0.231135 |
| GTF2E1    | Down-regulated | -1.14726 | 0.0357689 | 0.269771 |
| RAP1GDS1  | Down-regulated | -1.15832 | 0.0057532 | 0.159716 |
| DCAF7     | Down-regulated | -1.15991 | 0.0253812 | 0.246468 |
| MSH6      | Down-regulated | -1.1641  | 0.0470057 | 0.289191 |
| LAMB1     | Down-regulated | -1.17781 | 0.0375546 | 0.275477 |
| SLK       | Down-regulated | -1.27133 | 0.0120977 | 0.208381 |
| FKBP8     | Down-regulated | -1.30087 | 0.0271783 | 0.248361 |
| TRGC1     | Down-regulated | -1.3066  | 0.02151   | 0.241679 |
| TCF7L2    | Down-regulated | -1.3624  | 0.0285155 | 0.250344 |
| UTP18     | Down-regulated | -1.43594 | 0.0162928 | 0.223155 |
| FHAD1     | Down-regulated | -1.44845 | 0.0082325 | 0.190682 |
| PCID2     | Down-regulated | -1.47524 | 0.0433648 | 0.28608  |
| MAOB      | Down-regulated | -1.47728 | 0.025171  | 0.246468 |
| NABP2     | Down-regulated | -1.56225 | 0.0296994 | 0.253672 |
| OR51L1    | Down-regulated | -1.57975 | 0.008846  | 0.190682 |
| MTA1      | Down-regulated | -1.61299 | 0.0263538 | 0.247685 |
| EIF2D     | Down-regulated | -1.62638 | 0.0267024 | 0.248361 |
| CDKAL1    | Down-regulated | -1.64445 | 0.0499353 | 0.294471 |
| AKAP12    | Down-regulated | -1.65645 | 0.0014755 | 0.110936 |
| ZAP70     | Down-regulated | -1.68626 | 0.016048  | 0.223155 |
| TSC22D1   | Down-regulated | -1.76922 | 0.0085793 | 0.190682 |
| SCLY      | Down-regulated | -1.8362  | 0.0030465 | 0.143149 |
| ZKSCAN5   | Down-regulated | -1.88322 | 0.0325283 | 0.262041 |
| EEF1AKMT2 | Down-regulated | -1.88958 | 0.0069692 | 0.175691 |
| JAG1      | Down-regulated | -2.15852 | 0.0040918 | 0.144778 |
| TIMM50    | Down-regulated | -2.30383 | 0.0242443 | 0.246468 |
| SNAPIN    | Down-regulated | -2.34203 | 0.0073243 | 0.178747 |
| PALLD     | Down-regulated | -3.15223 | 5.48E-05  | 0.039531 |
| BIRC6     | Down-regulated | -3.30747 | 0.0434749 | 0.28608  |
| TGM3      | Down-regulated | -3.33022 | 0.0381725 | 0.277843 |
| CADM1     | Down-regulated | -3.3899  | 0.0334706 | 0.264667 |
| CRIP1     | Down-regulated | -6.16366 | 0.0005197 | 0.072135 |

**Table S3.** GSEA details of the up-regulation of ribosome in DLD1-R

| Protein (Gene symbol) | Rank in Gene List | Rank Metric Score | Running Enrichment Score | Core Enrichment |
|-----------------------|-------------------|-------------------|--------------------------|-----------------|
| RPL30                 | 23                | 2.484             | 0.0291                   | Yes             |
| RPS17                 | 55                | 2.068             | 0.0488                   | Yes             |
| RPS16                 | 68                | 1.877             | 0.0728                   | Yes             |
| RPS11                 | 91                | 1.692             | 0.0902                   | Yes             |
| RPL8                  | 92                | 1.691             | 0.1159                   | Yes             |
| RPL14                 | 101               | 1.622             | 0.1375                   | Yes             |
| RPS9                  | 103               | 1.615             | 0.1616                   | Yes             |
| RPL32                 | 112               | 1.577             | 0.1826                   | Yes             |
| RPS25                 | 119               | 1.559             | 0.204                    | Yes             |
| RPS2                  | 122               | 1.53              | 0.2264                   | Yes             |
| RPS3A                 | 140               | 1.471             | 0.2424                   | Yes             |
| RPL18                 | 141               | 1.469             | 0.2647                   | Yes             |
| RPL5                  | 142               | 1.466             | 0.2869                   | Yes             |
| RPL17                 | 144               | 1.46              | 0.3087                   | Yes             |
| RPS23                 | 156               | 1.419             | 0.3261                   | Yes             |
| RPS10                 | 168               | 1.376             | 0.3428                   | Yes             |
| RPL11                 | 179               | 1.34              | 0.3594                   | Yes             |
| RPS7                  | 184               | 1.326             | 0.378                    | Yes             |
| RPS20                 | 188               | 1.295             | 0.3966                   | Yes             |
| RPL10                 | 193               | 1.275             | 0.4144                   | Yes             |
| RPL19                 | 194               | 1.274             | 0.4337                   | Yes             |
| RPS28                 | 206               | 1.228             | 0.4483                   | Yes             |
| RPL13                 | 207               | 1.225             | 0.4669                   | Yes             |
| RPS21                 | 211               | 1.213             | 0.4841                   | Yes             |
| RPS24                 | 236               | 1.154             | 0.4926                   | Yes             |
| RPS3                  | 240               | 1.147             | 0.5089                   | Yes             |
| RPS5                  | 257               | 1.114             | 0.5198                   | Yes             |
| RPL23                 | 273               | 1.063             | 0.5303                   | Yes             |
| RPL38                 | 276               | 1.058             | 0.5456                   | Yes             |
| RPS8                  | 290               | 1.028             | 0.5564                   | Yes             |
| RPSA                  | 313               | 0.985             | 0.5631                   | Yes             |
| RPL37A                | 318               | 0.972             | 0.5763                   | Yes             |
| RPL6                  | 350               | 0.914             | 0.5785                   | Yes             |
| RPL9                  | 362               | 0.902             | 0.5881                   | Yes             |
| RPL3                  | 396               | 0.853             | 0.5887                   | Yes             |
| RPL27A                | 398               | 0.853             | 0.6013                   | Yes             |
| RPL10A                | 405               | 0.834             | 0.6116                   | Yes             |
| RPS13                 | 442               | 0.792             | 0.6102                   | Yes             |
| RPS15                 | 457               | 0.777             | 0.6167                   | Yes             |
| RPS19                 | 458               | 0.775             | 0.6285                   | Yes             |
| RPS12                 | 459               | 0.772             | 0.6402                   | Yes             |

|         |      |        |        |     |
|---------|------|--------|--------|-----|
| RPS18   | 529  | 0.683  | 0.6247 | Yes |
| MRPL13  | 531  | 0.68   | 0.6346 | Yes |
| RPS27L  | 532  | 0.678  | 0.6449 | Yes |
| RPL22   | 534  | 0.674  | 0.6548 | Yes |
| RPS15A  | 553  | 0.654  | 0.6579 | Yes |
| RPL21   | 565  | 0.643  | 0.6636 | Yes |
| RPL35A  | 567  | 0.64   | 0.6729 | Yes |
| RPL18A  | 630  | 0.57   | 0.6583 | Yes |
| RPL26L1 | 671  | 0.518  | 0.6512 | Yes |
| RPS26   | 675  | 0.514  | 0.6579 | Yes |
| FAU     | 692  | 0.499  | 0.6594 | Yes |
| RPL35   | 699  | 0.494  | 0.6647 | Yes |
| RPL7    | 712  | 0.48   | 0.6675 | Yes |
| RPL24   | 717  | 0.475  | 0.6732 | Yes |
| RPL12   | 814  | 0.37   | 0.6428 | No  |
| RPS27   | 830  | 0.359  | 0.6426 | No  |
| RPL7A   | 946  | 0.262  | 0.6035 | No  |
| RPL27   | 963  | 0.241  | 0.6012 | No  |
| RPL36   | 1107 | 0.138  | 0.5497 | No  |
| RPS4X   | 1131 | 0.113  | 0.5428 | No  |
| RPS6    | 1184 | 0.069  | 0.5243 | No  |
| RPL15   | 1215 | 0.051  | 0.5138 | No  |
| RPL23A  | 1239 | 0.03   | 0.5057 | No  |
| RPL22L1 | 1414 | -0.1   | 0.442  | No  |
| RPL4    | 1456 | -0.138 | 0.4287 | No  |
| RPL29   | 1509 | -0.173 | 0.4118 | No  |
| RPLP0   | 1631 | -0.265 | 0.3705 | No  |
| RPS27A  | 1636 | -0.268 | 0.3731 | No  |
| RPLP2   | 2051 | -0.583 | 0.2267 | No  |
| RPLP1   | 2301 | -0.818 | 0.1458 | No  |
| RPL13A  | 2523 | -1.185 | 0.081  | No  |

**Table S4.** GSEA details of the down-regulation of DNA replication in DLD1-R

| Protein (Gene symbol) | Rank in Gene List | Rank Metric Score | Running Enrichment Score | Core Enrichment |
|-----------------------|-------------------|-------------------|--------------------------|-----------------|
| LIG1                  | 640               | 0.56              | -0.1991                  | No              |
| MCM7                  | 863               | 0.335             | -0.2591                  | No              |
| MCM6                  | 1266              | 0.014             | -0.4059                  | No              |
| MCM3                  | 1289              | -0.006            | -0.4136                  | No              |
| RPA2                  | 1937              | -0.492            | -0.6197                  | No              |
| FEN1                  | 2130              | -0.652            | -0.6482                  | Yes             |
| MCM2                  | 2136              | -0.658            | -0.6076                  | Yes             |
| RFC3                  | 2154              | -0.673            | -0.5704                  | Yes             |
| PCNA                  | 2196              | -0.707            | -0.5399                  | Yes             |
| RFC5                  | 2202              | -0.712            | -0.4958                  | Yes             |
| RPA1                  | 2206              | -0.719            | -0.4506                  | Yes             |
| RFC4                  | 2225              | -0.739            | -0.4096                  | Yes             |
| RPA3                  | 2230              | -0.751            | -0.3626                  | Yes             |
| MCM4                  | 2418              | -0.978            | -0.3683                  | Yes             |
| MCM5                  | 2427              | -0.992            | -0.3072                  | Yes             |
| SSBP1                 | 2488              | -1.099            | -0.2584                  | Yes             |
| POLE3                 | 2546              | -1.263            | -0.1979                  | Yes             |
| RFC2                  | 2613              | -1.491            | -0.126                   | Yes             |
| RNASEH2B              | 2725              | -2.666            | 0.0051                   | Yes             |

**Table S5.** GSEA details of the up-regulation of actin cytoskeleton in HCT116-R

| Protein (Gene symbol) | Rank in Gene List | Rank Metric Score | Running Enrichment Score | Core Enrichment |
|-----------------------|-------------------|-------------------|--------------------------|-----------------|
| KRAS                  | 32                | 1.383             | 0.0371                   | Yes             |
| ROCK2                 | 36                | 1.352             | 0.0839                   | Yes             |
| EZR                   | 41                | 1.334             | 0.1297                   | Yes             |
| MYH14                 | 56                | 1.241             | 0.1684                   | Yes             |
| ARPC3                 | 89                | 1.095             | 0.1953                   | Yes             |
| ARPC5                 | 106               | 1.003             | 0.2249                   | Yes             |
| MSN                   | 109               | 0.994             | 0.2594                   | Yes             |
| ARPC5L                | 131               | 0.894             | 0.2832                   | Yes             |
| PXN                   | 150               | 0.847             | 0.3065                   | Yes             |
| MYL12B                | 244               | 0.716             | 0.2972                   | Yes             |
| RRAS2                 | 255               | 0.698             | 0.3182                   | Yes             |
| BAIAP2                | 262               | 0.689             | 0.3404                   | Yes             |
| PFN2                  | 319               | 0.618             | 0.3413                   | Yes             |
| ACTN4                 | 325               | 0.612             | 0.3612                   | Yes             |
| SSH3                  | 335               | 0.604             | 0.3792                   | Yes             |
| RHOA                  | 408               | 0.552             | 0.3719                   | Yes             |
| NRAS                  | 443               | 0.532             | 0.3781                   | Yes             |
| DIAPH1                | 474               | 0.51              | 0.3849                   | Yes             |
| MYH9                  | 521               | 0.482             | 0.3848                   | Yes             |
| VCL                   | 544               | 0.47              | 0.3933                   | Yes             |
| ARPC2                 | 564               | 0.458             | 0.4024                   | Yes             |
| BCAR1                 | 571               | 0.453             | 0.4162                   | Yes             |
| ACTN1                 | 599               | 0.439             | 0.4217                   | Yes             |
| CDC42                 | 633               | 0.421             | 0.4243                   | Yes             |
| CRK                   | 680               | 0.395             | 0.4211                   | Yes             |
| ARHGEF1               | 701               | 0.389             | 0.4275                   | Yes             |
| PAK1                  | 746               | 0.359             | 0.4238                   | Yes             |
| ARPC1B                | 797               | 0.335             | 0.4169                   | Yes             |
| PPP1CA                | 808               | 0.328             | 0.4248                   | Yes             |
| ITGA6                 | 843               | 0.313             | 0.4232                   | Yes             |
| PIP4K2C               | 845               | 0.313             | 0.434                    | Yes             |
| CFL2                  | 867               | 0.304             | 0.4369                   | Yes             |
| PPP1R12A              | 873               | 0.302             | 0.4457                   | Yes             |
| PPP1CB                | 898               | 0.285             | 0.4469                   | Yes             |
| TMSB4X                | 979               | 0.249             | 0.4258                   | No              |
| PFN1                  | 1001              | 0.24              | 0.4265                   | No              |
| MYH10                 | 1012              | 0.237             | 0.4311                   | No              |
| ARPC4                 | 1173              | 0.17              | 0.3774                   | No              |
| IQGAP1                | 1220              | 0.156             | 0.3657                   | No              |
| RAC1                  | 1245              | 0.147             | 0.362                    | No              |
| MAP2K1                | 1314              | 0.12              | 0.3408                   | No              |

---

|         |      |        |        |    |
|---------|------|--------|--------|----|
| CYFIP2  | 1408 | 0.084  | 0.3091 | No |
| NCKAP1  | 1415 | 0.082  | 0.3098 | No |
| CFL1    | 1416 | 0.082  | 0.3127 | No |
| GIT1    | 1429 | 0.075  | 0.3109 | No |
| MAP2K2  | 1444 | 0.068  | 0.308  | No |
| BRAF    | 1500 | 0.041  | 0.2889 | No |
| GSN     | 1551 | 0.016  | 0.2708 | No |
| ITGAV   | 1557 | 0.012  | 0.2694 | No |
| GNG12   | 1670 | -0.032 | 0.2287 | No |
| ARPC1A  | 1671 | -0.033 | 0.2299 | No |
| RDX     | 1693 | -0.04  | 0.2234 | No |
| ENAH    | 1756 | -0.064 | 0.2025 | No |
| ACTB    | 1877 | -0.122 | 0.162  | No |
| CYFIP1  | 1900 | -0.136 | 0.1586 | No |
| ITGA2   | 1910 | -0.142 | 0.1603 | No |
| ITGB4   | 1913 | -0.144 | 0.1647 | No |
| ROCK1   | 1990 | -0.183 | 0.1428 | No |
| PIP4K2A | 2020 | -0.198 | 0.1389 | No |
| ITGA3   | 2064 | -0.223 | 0.1308 | No |
| PAK2    | 2136 | -0.258 | 0.1134 | No |
| CRKL    | 2165 | -0.276 | 0.1127 | No |
| ITGB1   | 2254 | -0.33  | 0.0916 | No |
| CSK     | 2388 | -0.451 | 0.0579 | No |
| MAPK1   | 2464 | -0.537 | 0.0489 | No |
| PAK4    | 2554 | -0.686 | 0.04   | No |
| EGFR    | 2629 | -0.854 | 0.0426 | No |

---

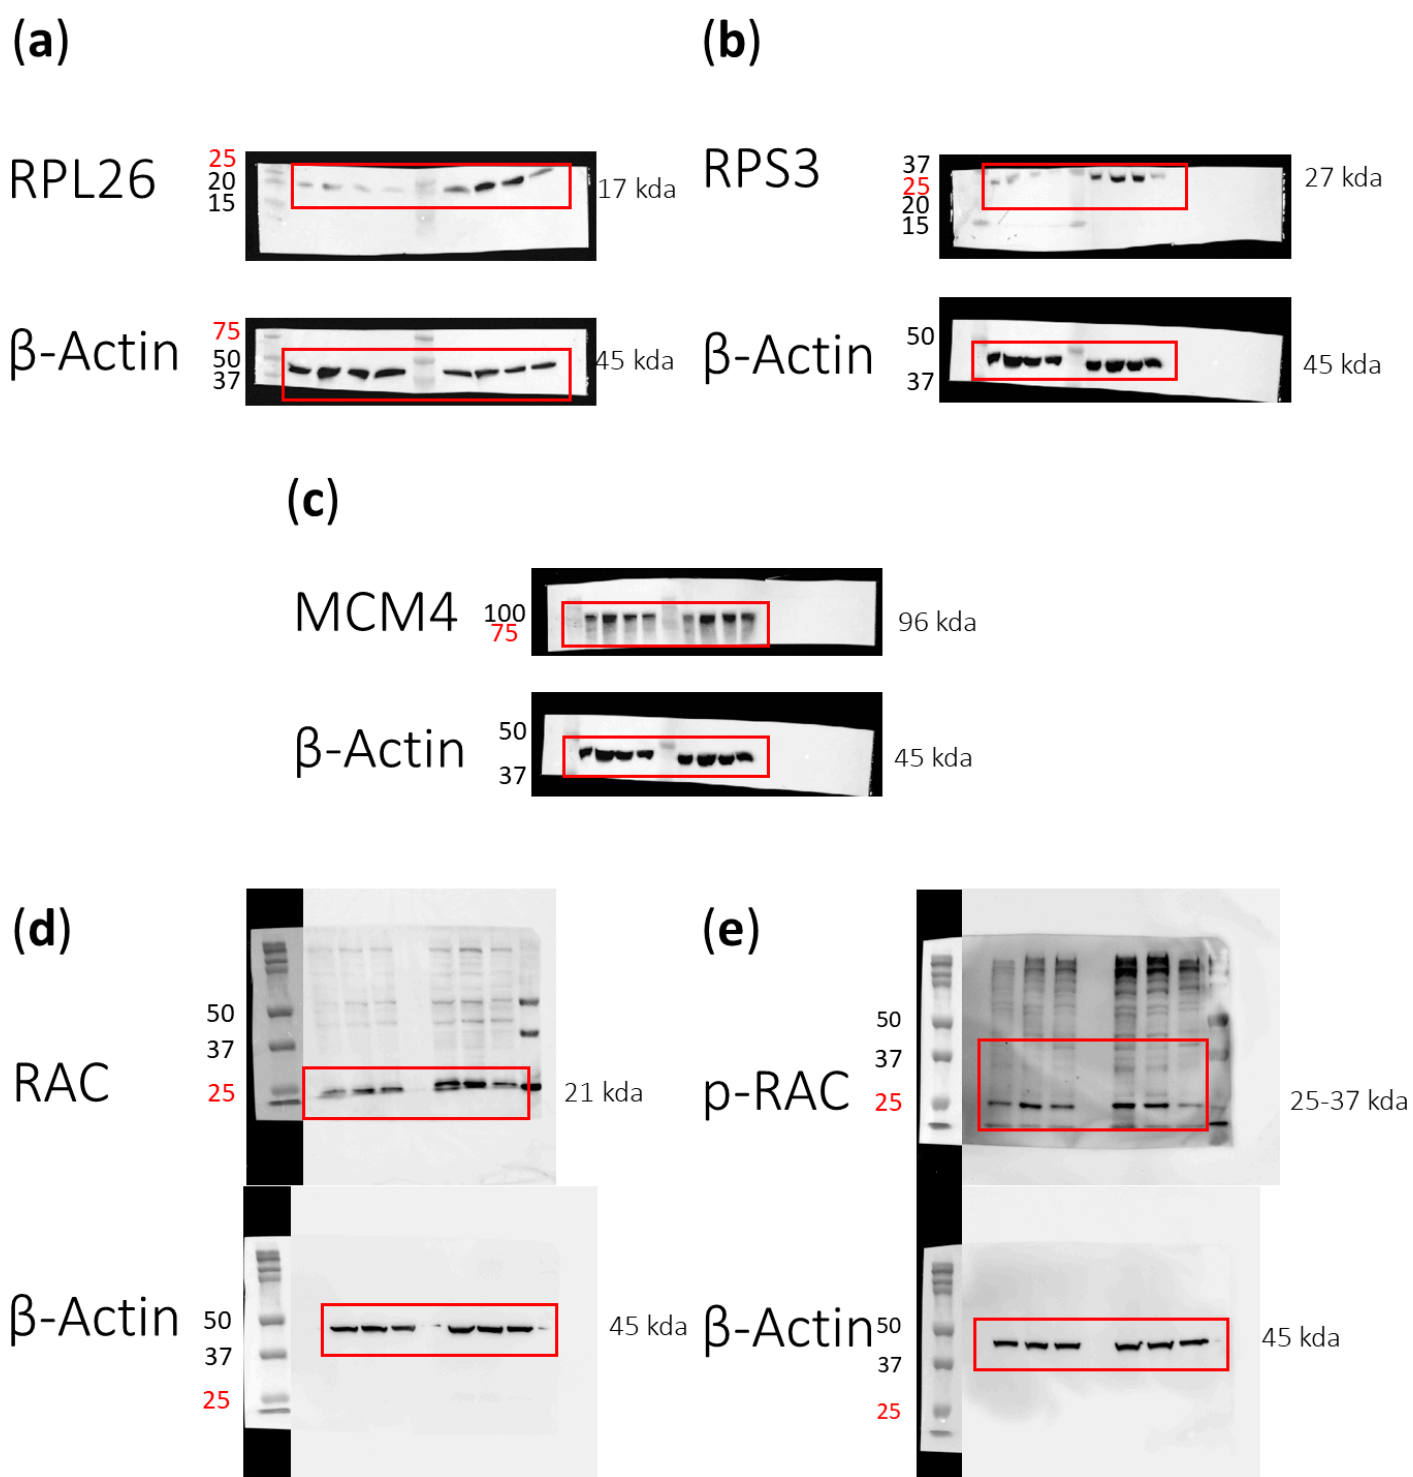

Figure S1. Original western blots of Figure 6
